1 Effect of COVID-19 pandemic on essential health care services and mitigation  
2 strategies implemented in Benishangul gumuz: An emerging region of Ethiopia

3 **Alemayehu Assefa Amaya<sup>1</sup>**

4 <sup>1</sup>Assosa University, College of Health Science, Assosa, P.O. Box 18, Ethiopia. E-mail: [aassefa28@yahoo.com](mailto:aassefa28@yahoo.com).

5 **Abstract**

6 Health systems of low-to-middle-income countries may have fewer buffering resources and  
7 capacity against shocks from a pandemic. This study assessed the effects of COVID-19 on  
8 essential health care services and its mitigation strategies employed in Benishangul Gumuz Region  
9 in the Assosa district of western Ethiopia. Institutional based cross-sectional study design with  
10 multilevel triangulated mixed approach was used. Purposively selected health facilities and key  
11 informant or in-depth interviewee from different facilities were involved. Document review from  
12 health facilities reports and case registration logs were used to access the service utilizations per-  
13 and -post the pandemic. The study showed that there was a significant decrement in antenatal care  
14 (ANC) visits, family planning new acceptors, family planning repeated acceptors, skilled delivery,  
15 and in postnatal care within 7 days of delivery during the COVID-19 pandemic. There was an  
16 increase in home delivery, teenage pregnancy and still births. There was also a significant  
17 reduction in the vaccination coverage for almost all vaccines. During the pandemic, children  
18 treated for diarrheal disease and the number of people screened for human immunodeficiency virus  
19 (HIV), new HIV-positive individuals, and new HIV-positive individuals receiving antiretroviral  
20 therapy have decreased significantly. There has been a statistically significant increase in the  
21 number of people with elevated blood sugar during the pandemic. The COVID-19 pandemic has

22 had a significant negative impact on essential health services, most notably in Benishangul Gumuz  
23 Region. Groups of individuals considered to be at higher risks of morbidity and mortality are the  
24 most significantly affected. Mitigation strategies have been implemented to address the indirect  
25 effects of the COVID-19 pandemic and improve health care delivery in the region's highly affected  
26 areas. Urgent and comprehensive action is needed to mitigate the future (long-term) impact of  
27 Covid-19 on the health of community in the region.

28 **Key words:** *COVID-19, Ethiopia, Essential health care services, Pandemic, mitigation, Assosa*

## 29 Introduction

30 Globally, efforts to control the spread of corona virus infection disease 2019 (COVID-19) have  
31 slowed the exponential growth of new cases, but have also led to unprecedented disorder in society,  
32 which has had a huge impact on health care, social, and economy (1,2,3). The pandemics has  
33 caused a concentrated nationwide response, during which other services, including the provision  
34 of healthcare have been neglected. The pandemics test the structure and competence of the health  
35 system. However, the post-pandemic period saw first-choice efforts to restore economic activity.  
36 The health system is still weak, at times getting weaker by the impact of the pandemic (4).

37 Currently, healthcare facilities in low- and middle- income countries (LMICs) are generally weak.  
38 It is stated that individuals in LMICs are deprived of adequate healthcare standard and cannot  
39 access medical facilities on time (5). In LMICs, even if there is no crisis, the coverage of essential  
40 health services is lacking, and they are often further overwhelmed and stretched during the  
41 pandemic. The challenges posed by the pandemic in LMICs are perhaps the most daunting. The  
42 pandemic has had an indirect impact on essential health services in many parts of the world, which  
43 may lead to increased morbidity and mortality and the loss of the gains made in the past few  
44 decades (6).

45 If this continues to be unmanaged, a strained health care system, essential health care interruption,  
46 and redistributed resources may lead to unrelated pandemic, maternal and neonatal morbidity and  
47 mortality, increased adolescent pregnancies and other reproductive health crisis are just like public  
48 health emergencies in the past. Evidence from the Ebola outbreak in Western Africa, for example,  
49 suggests that it has negative and indirect effects on sexual and reproductive health (SRH).

50 According to an analysis of data from Sierra Leone's Health Management Information System  
51 (HMIS), decreases in maternal and newborn care due to disrupted services and fear of seeking  
52 treatment during the outbreak contributed to over 3,600 maternal deaths, neonatal deaths, and  
53 stillbirth (7). Evidence also shows that after the Ebola epidemic, the number of antenatal care visits  
54 and facility deliveries in Guinea did not recover to prior levels even after six months (8). This  
55 implies that the pandemics had sustained effects on the countries already inadequate level of health  
56 care.

57 Infectious diseases that require continuous support from the health system: Patients with  
58 tuberculosis (TB) and human immune deficiency virus (HIV) need a continuous supply of  
59 medicines. Interruptions in the intake of medicine are getting frequent. This is not only detrimental  
60 to the health of the patient but is also associated with the risk of the development of resistance to  
61 specific therapy. Correspondingly, a large number of patients of non-infectious chronic diseases  
62 (NCDs) including those who need periodic but regular administration of cancer therapies or long-  
63 term medication like diabetic and cardiac patients depend on medicines supply, monitoring and  
64 care of complications. Failure to provide these products and services may have serious negative  
65 impacts on the physical and mental health of these individuals (9).

66 The ratio of health professional to population in Ethiopia is 0.96 per 1000 populations (10), which  
67 is much lower than the world health organization (WHO) recommended standards, (4.45 per 1000  
68 populations) to meet the sustainable development goal health targets (11). This suggests that the  
69 country's health needs are not being adequately addressed and that an unplanned increase in  
70 COVID-19 related needs could exacerbate the country's problems with essential health care  
71 services.

72 Based on these statements the COVID-19 pandemic could have critical effects on healthcare  
73 system, particularly in emerging regions like Benishangul Gumuz Region (BGR), where the health  
74 system is inadequate, poor infrastructure, extensive poverty, and high burden of other infectious  
75 disease like acquired immunodeficiency syndrome (AIDS), TB, malaria and neglected tropical  
76 diseases (NTDs) (12). However, there is no comprehensive scientific evidence on the impact of  
77 the COVID-19 pandemic on essential health services in Benishangul Gumuz Region. Therefore,  
78 this study aimed to assess the effects of COVID-19 pandemic on essential health services provision  
79 in Benishangul Gumuz Region in the Assosa district of western Ethiopia.

80 This will provide timely data and evidence to help in monitor and mitigate the crisis and assess the  
81 employed strategies to minimize its effects on essential health care services. It is also an  
82 opportunity to assess the existing health system and health infrastructure and response capacities  
83 during such crisis, which is important to assess continuity of essential services and provision of  
84 care during the crisis and in recovery. This will provide timely information on the status of  
85 essential health care services during the pandemic and post pandemic period which helps in  
86 discussion making.

87 In so doing this study, it will points policy makers to the way toward reforms that could improve  
88 the ability of the country and the region to cope with likely future epidemics and pandemics.

## 89 Methods and Materials

### 90 Description of the Study Area

91 For maps see fig. 1. Benishangul Gumuz Region is one of the ten Regional States of Ethiopia. The  
92 region is located in the western part of the country between 9° 30'- 11° 30' latitude in the north and  
93 34° 20'- 36° 30' longitudes in the east with an average altitude of 1570m. The total land surface of  
94 the region is estimated to be 50,380 km<sup>2</sup> (13). It is divided into three administrative zones: Assosa,  
95 Kamashi, and Metekel, and 20 districts or woredas. The regional capital city is Assosa. The region  
96 has three agro-climatic zones (13): the lowlands is the largest zone, located below 1500m altitude,  
97 representing more than 75% of the total area, with annual rainfalls in general lower than 400 mm.  
98 The second-largest zone is between 1500m and 2500m and represents 24% of the total area. The  
99 third and smallest zone (1%) is located above 2500m and includes mountain ranges and high  
100 plateaus.

101 The regional capital, Assosa is located at a distance of 687 km away from the capital city of the  
102 country, Addis Ababa. The region has also an international boundary with Sudan and South Sudan  
103 on the west, and it is bordered by the Amhara Regional State on the east and north, by the Oromia  
104 Regional State on the east and southeast, and by the Gambella Region on the south (13).

105 Assosa district is one of the 3 districts in Benishangul-Gumuz Region of Ethiopia. The majority  
106 ethnic group in the zone is the Berta people, and it is also home for different ethnic groups from  
107 different Ethiopian regions. The zone has two hospitals (one general and the other primary) and  
108 23 health centers of which only 9 of them providing all essential health care services.

## 109 Study Design and Approach

110 An institutional based cross-sectional study design with multilevel triangulation-mixed method  
111 approach involving quantitative and qualitative data was implemented to assess the effects of  
112 COVID-19 pandemic on essential health care services before and after the COVID-19 pandemic  
113 and to evaluate response measures taken against the effect of the pandemic on essential health care  
114 services in Benishangul Gumuz Region in the Assosa district of western Ethiopia. It is multilevel,  
115 because it involved different stockholders (individuals, health care providers at different essential  
116 health care unit and program implementers at different level). It is triangulation mixed, because,  
117 different, but complementary data to answer similar research objectives were used.

## 118 Source and Type of Data

119 Secondary data (monthly reports on essential health care services) from selected health facilities  
120 (Assosa general hospital, Assosa HC, Bambasi health center, Homosha health center, Kurmuk  
121 health center, Menge health center, Menge Hospital, Sherekol health center and Buldigilu health  
122 center) and primary data through interviewing the following concerned bodies from: Regional  
123 health bureau (RHB) representative, maternal and child health officer, NCD officer, HIV officer,  
124 NTDs officer, malaria officer, immunization officers, logistic officer and Pharmacal head, and the  
125 following concerned bodies from each health facilities: facility head, finance head, TB focal  
126 person, TB patients, HIV focal person, people living with human immunodeficiency virus  
127 (PLHIV), immunization focal person, families vaccinating their child, outpatient diagnosis (OPD)  
128 focal person, antenatal care (ANC) focal person, deliver unity focal person, laboratory head, family  
129 planning (FP) focal person, malnutrition management center focal person, and Pharmacy head  
130 using chick lists. observations were also made at selected health service centers.

## 131 Sample Size Determination and Sampling Procedure

132 The sample size of the study was nine health facilities, the health facilities actively giving essential  
133 health care services in the zone and 24 interviews were planned. Purposive sampling technique  
134 was implemented to select health facilities and the individuals for interview. If two or more health  
135 personnel are found at the service centers, one health personnel were selected by simple random  
136 sampling. Similarly, if two or more health service seekers or patients are found at the service  
137 centers, one was selected by simple random sampling

## 138 Eligibility criteria

139 All health care facilities in Assosa district that give essential health care services during the last  
140 four years and that report using HIMS under the jurisdiction of the regional health bureau were  
141 included in the study.

## 142 Data Collection Tools and Techniques

143 Data was abstract from monthly essential health care reports from each health facilities using  
144 standardized forms for data gathering and the indicated target persons were interviewed using  
145 check lists. For data abstraction from reports, reports were categorized in to two sections; before  
146 the pandemic (July, 01,2018 to December,30,2019) and after the pandemic (January,01,2020 to  
147 June 2021) in Ethiopian. Data extraction standardized form, structured/semi-structured questioners  
148 and interview guides were used. The Participants were asked a series of questions regarding the  
149 effects of COVID-19 pandemic on healthcare system and the response measures taken against the  
150 effect (workers safety support related responses, patient service delivery related responses, and  
151 data streams for situational analysis).



## 152 Data Management and Analysis

### 153 Quantitative Data Management and Analysis

154 Quantitative data were analyzed using SPSS version 25. Descriptive statistics are used to summarize  
155 distribution frequencies and are presented using a table. The Wilcoxon signed- rank test was used to  
156 compare observations between the peri-COVID-19 period and the post-COVID-19 pandemic period, with  
157 a significance level of  $\alpha = 0.05$ .

### 158 Qualitative Data Management and Analysis

159 The qualitative data was analyzed manually using the thematic method as previously described  
160 (Braun *et al.*, 2006). All qualitative data was collected by audio-recording, and the verbatim  
161 responses to each question were translated and transcribed, and recorded in Microsoft Word. A  
162 code sheet has been created following the focus group and the key informant guides after which  
163 the textual data were encoded into selected themes and a master sheet analysis was carried out.  
164 Thematic analysis is used to categorized into themes and then formulate ideas by looking at the  
165 response patterns. The analyzed data was presented in text form.

### 166 Data Quality Assurance

167 The team was oriented and trained for two days on basic techniques. They were supervised by  
168 experienced health professionals and the filled questionnaires were checked daily. Furthermore,  
169 the questionnaire was pre-tested. In addition, to assure the quality of qualitative data, two  
170 individuals were independently immersed themselves in the data within the highlighting process.  
171 The two individuals then meet to determine codes that accurately represented the participants'

172 experiences and define each theme. Then, two people independently encoded (line-by-line) the  
173 complete responses from all participants to establish an inter-rater agreement. Coding  
174 disagreements were resolved through discussion and review of the data.

## 175 Results

176 Nine health facilities in Benishangul Gumuz Region in the Assosa district (including 7 health  
177 centers and two hospitals) were included in this study. From planned 24 interviews only 14  
178 Interviews were conducted due to information saturation on this number.

### 179 Effects of COVID-19 pandemic on maternal, neonatal and child health care services

180 The results of this study show that the hard lockdown during the COVID-19 pandemic has greatly  
181 affected access to and utilization of essential healthcare services in the Benishangul Gumuz  
182 Region. The study showed that there was a significant decrease of 29%,50%,15%,32.2%, and  
183 80.5%, in at least 4 ANC visits, family planning new acceptors, family planning repeated  
184 acceptors, skilled delivery, and in postnatal care within 7 days of delivery during the COVID-19  
185 pandemic compared to the pre-pandemic period respectively (Table 1).

186 There was an increase in the number of home birth notices (42%), teenage pregnancies (38.2%)  
187 and stillbirths (36.4%). The increase in the number of home birth notices was statistically  
188 significant ( $P=0.008$ ), but the increment in the number of teenage pregnancies and stillbirths was  
189 not statistically significant (Table 1).

190 No significant differences were observed in neonatal deaths within 7 days of delivery  
191 (institutional), neonates treated for sepsis, and notified neonatal deaths (community based) before  
192 and after the COVID-19 pandemic (Table 1).

193 There was a decrease in BCG vaccine doses given (27.5%) which is significant ( $P=0.033$ ) and a  
194 decrease in polio vaccine doses given (49.4%), pentavalent vaccine doses given (47%), and  
195 pneumococcal conjugated vaccine doses given (47%) which are all significant ( $P=0.043$ ). The  
196 number of measles vaccine doses given (all ages) was also come down by (53.8%) which is  
197 significant ( $P=0.014$ ) (Table 1).

198 There was a significant ( $P=0.001$ ) decrease in the number of children treated for diarrhea (124%)  
199 during the COVID-19 pandemic compared to the per pandemic period (Table 1). A clinician at  
200 under 5 OPD in one health facility said that “...*the number of children presented with complaint*  
201 *of diarrhea was highly reduced during the pandemic, but later after the pandemic peak the*  
202 *diarrhea cases are increasing...*”

203 The study found that there were no significant excess overall still births and community based  
204 neonatal death notification in the post-pandemic compared to the pre-pandemic period, although  
205 the number of causes were higher than the level of per-pandemic period (Table 1). A pregnant  
206 mother coming for ANC at one health facility said that “*the time was stressful; it was not easy to*  
207 *visit health facilities due to fear of the pandemic and the health professional were also in stress*  
208 *during the time... many interrupt their ANC follow up and home delivery was also common...*”

209 The study also found that there was no significant decrement in number of under 5 children  
210 screened for malnutrition and diagnosed as malnourished post-pandemic period. Health

211 professional at under 5 OPD in one health facility said that “*generally the number of malnourished*  
212 *children is increasing, post-pandemic the number of children coming to our facility is decreased,*  
213 *but the number of malnourished children is increasing...*”

214 Effects of COVID-19 pandemic on HIV and sexually transmitted infections care services

215 There was a decrease of 42%,129% and 106.5% in the number of individuals screened for HIV, new HIV positive individuals, and new  
216 HIV positive individuals put on ART during the pandemic compared to pre-pandemic period respectively. The decrements are  
217 statistically significant at p-value of 0.043, 0.012 and 0.035 respectively (Table 2).

218 The COVID-19 pandemic has imposed a great economic and psychosocial impact on people living with the virus. A woman on ART  
219 treatments coming for collecting her ART medication at one health facility said that “*the media, the community, and even the health*  
220 *professionals are talking that we are the high-risk group and this makes us hopeless and highly stressed. We are stigmatized, we lost*  
221 *our freedom, and it was difficult to access our medications. Personally, I have missed many pills, but later the health professional*  
222 *extends the medication collection time to 6 months which actually reduced our suffering.*”

223 Social isolation and Loneliness were also another challenge for PLHIV. A woman at ART clinic said that “*I was separated from my*  
224 *families and my friends and this condition worsen my stress. There is a time that I dived to hung myself...anyways it is passed thanks to*  
225 *GOOD. However, we are still in financial crisis ...*”

226 Morbidity and mortality among PLHIV were high and the number of HIV testing service seekers were highly reduced during the  
227 pandemic. For example, a health professional working in ART clinic at one health facility said “*the period was stressful especially to*  
228 *PLHIV and health professionals working in ART clinic... most patients have missed their appointment and their pills. Most of PLHIV*

229 *were severely affected by the pandemic and most are mentally disordered during the pandemic. HIV test and prevention measures were*  
230 *highly affected during the pandemic, because the numbers of service seekers were highly reduced due to fair of COVID-19; health*  
231 *professionals fair of the pandemic; shortage of test kit and personal protection equipment and materials.*

232 Adherences to ART has been greatly reduced during the pandemic and the ART drop rate has been high, and HIV incidence has also  
233 been greatly reduced during the pandemic. For example, a health official said that “*the effect of the pandemic on adherences and ART*  
234 *follows up, Viral load test and other follow-ups and health services was high. For example, about 170 PLHIV was lost from follow-up*  
235 *during the pandemic, who were later traced and about 80% of them returned to the regular follows up. ...the numbers of new HIV cases*  
236 *has been greatly reduced during the pandemic, this is actually due to the numbers of people tested for HIV during the pandemic were*  
237 *low comparatively”*

238 There was a decrease of 93%,82.4% and 88% in the number of individuals screened for sexually transmitted infection (STI) by syndrome  
239 diagnosis, STI cases treated, and STI cases partners traced and treated during the pandemic compared to pre-pandemic period  
240 respectively. The decrease is statistically significant at a p-value of 0.028 (Table 2).

241 An interview with a clinician working at OPD also confirms the decrement in the number of people visiting health facilities for STI  
242 screening and the STI cases during the pandemic. He said that “*health facilities visiting for non-COVID-19 related cases was actually*  
243 *reduced during the pandemic and similarly individuals seeking STI care services was reduced and the incidences of STI cases was also*

244 *reduced. I don't think social distancing measures really reduced STI incidences, rather it is probable due to cases are not seeking*  
245 *services."*

#### 246 **Effects of COVID-19 pandemic on TB and malaria care services**

247 There was no statistically significant increase in the number of people screened for TB (5.5%), but there was a statistically significant  
248 decrease in the number new TB cases (131.6%) during the pandemic compared to the pandemic period (P=0.042) (Table 3).

249 However, COVID-19 pandemic has imposed a great economic and psychosocial impact on old tuberculosis cases. A man on TB  
250 treatment coming for collecting his anti-TB medication at one health facility said that *"the media, the community, and every one talking*  
251 *that TB patients are at higher risk for COVID-19 infection and at high-risk of death. This leaves us in despair. We are stigmatized, we*  
252 *lost our freedom, and it was difficult to access our medicine. Personally, I missed many pills, but latter the health professional gave us*  
253 *our medication for 4/6 months which reduced our suffering."* A health professional working in a TB clinic at one health facility said  
254 *"the period was stressful especially to TB patients and health professionals working in TB clinic... most patients have missed their*  
255 *appointment and their pills. Later after the peak pandemic time was passed, we tried our best to trace the missed patients and make*  
256 *their refilling time longer and also have provided personal protections and psychosocial supports. The number of new cases is*  
257 *reduced..."*

258 The number of people visited health facilities for malaria and the number of individuals treated for malaria was decreased by 13.3% and  
259 22.7% respectively, which is statistically significant at p-value of 0.043 and 0.022 respectively (Table 3).

#### 260 Effects of COVID-19 pandemic on non-communicable disease care services

261 There was no a statistically significant increase in the number of individuals screened for DM (41%), but there was a statistically  
262 significant increase in the number of people with raised blood sugar (74.4%; P=0.041) during the pandemic compared to pre- pandemic  
263 period (Table 4).

264 The number of people visited health facilities for HTN screening (56.8%) and the number of individuals with raised blood pressure  
265 (73.4%) was significantly increased at p-value of 0.032 and 0.006 respectively (Table 4). The high number of screened HTN risky people  
266 makes the number of people with raised blood pressure higher in this study.

267 A hypertensive woman coming for follow-up at one health facility said that “I don’t want to remember that time, *I was waiting day of*  
268 *my death and this makes us hopeless...I was stress much, isolated from my families... the other challenge was increase in price of*  
269 *medication and inaccessibility which worsen our problem...*



270 Impacts of COVID-19 on Neglected Tropical Diseases (NTDs)

271 In similar way as other health system COVID-19 have had great impact on NTDs control and elimination efforts. An official working  
272 in the program said that “... *have highly affected the activities of NTDs case management, deworming campaign and other prevention*  
273 *measures activity... for example, deworming campaigns were missed due to budget shortage or shift, human power shortage/shift,*  
274 *movement restriction due to the pandemic. Health facilities visiting was reduced and one of the NTDs controlling strategy treating cases*  
275 *was missed. These all affects the NTDs prevention and control efforts.*”

276 Financial impact to health care system due to COVID-19

277 Many health facilities reported experiencing financial instability because of increased expenses associated with responding to the  
278 pandemic and lower revenues from decreased use of other health facilities services. For example, a finance officer at one health facility  
279 said that “*there was shortage of supplies due to budget shift to COVID-19 prevention and control activities, and financing from NGOs*  
280 *was also reduced and transportation and movement restriction. Patient flow for other health care services also have been reduced and*  
281 *because of that the revenues from services is simultaneously reduced. We have been facing high shortage of medication especially for*  
282 *chronic disease like diabetes, heart disease and hypertension.*”

283 Unlike to urban health facilities that reported both patient fairs to come to health facilities and shortage of supplies as primary for  
284 redaction in essential health care services, rural health facilities reported shortage of supplies as the primary reason.

285 The Health Systems Impact of COVID-19 mitigation strategies undertaken

286 Transport and border restrictions introduced by community quarantine measures have been universally impacted health services access  
287 and delivery globally. This study showed that accesses to most basic health care services and health facilities come down during the  
288 pandemic (Table 1-4). Qualitative data collected through interview indicated, care seeking behaviors in both providers and patients have  
289 also changed as a result of restrictions and the fear of contracting COVID-19. On the supply side, the measures to contain COVID-19  
290 have been drain off away significant manpower and resources that provide routine essential services.

291 Mitigating measures for sexual and reproductive health services disrupted due to the pandemic are; giving services by adhering to  
292 COVID-19 prevention precautions, phone-based counseling and support, extending appointment durations for normal pregnancies, and  
293 community outreach mobilization and tracing after the peak of the pandemic are among the most common mitigation measures  
294 undertaken.

295 For example, a health professional working in MCH center in on health facility said that “...*during the pandemic most of the time the*  
296 *cases visiting our health facility were high risk individuals, like individuals who are twin pregnancy or other obstetric cases...the rate*  
297 *of stable cases visiting the facility have been significantly reduced. During the peak pandemic period we stayed providing services for*  
298 *those coming to the facility under restrict COVID-19 prevention protocol, but later after the peak the pandemic we implemented tracing*  
299 *and community outreach strategies and know it is much better.*”

300 Mitigating measures undertaken to reduce the possible impact of COVID-19 pandemic on HIV/AIDS care and services were the following  
301 as obtained from different concerned bodies at different health facilities. Home based medication supply through using health extension  
302 worker, extending the duration ART refiling and appointment 6 months for stable HIV cases and for every 2-3 months for new unstable  
303 HIV cases, overlapping all HIV/AIDS related services for PLHIV, shorting stay hours in the health facilities and in addition providing  
304 self-protection materials (facemask, glove, sanitizer) and early awareness creation on COVID-19 vaccine and giving priority to vaccinate  
305 this group of people are the major ones. A health official working on the program said that “... *we tried our best through these mitigation*  
306 *methods to minimize the impact of the pandemic on HIV/AIDS services and the prevention and control of the transmission. By doing*  
307 *this we able to traced about 80% of lost PLHIV and we hope the probability of COVID-19 infection among this group of people is*  
308 *reduced due to our mitigation measures.*”

309 Mental health problems (stress, being panic, depression) are common among the community, especially among individuals thought to  
310 be at high risk of morbidity and mortality of Covid-19 per information collected from health professionals and services seekers at  
311 different center of the health facilities. Dispute the reality of increment in mental health care service there was no additional new mental  
312 health services centers or improved capacities in the region. For example, a health person in one health facility said that “...*health*  
313 *seeking behavior for mental health is poor in the region and there is no strong mental health services center in the region and no new*  
314 *related activities done related with COVID-19 pandemic...actually mental health problem is raised especially among individuals*  
315 *thought to be high risk for the pandemic*”

316 A woman collecting here ART at one health facility said that "...most of our friends were mentally affected, we were lonely for long  
317 time and when we are alone, we think all the time about the condition. It was also difficult to go out for work and we lost our income.  
318 This all makes us stressed and depressed. Personally, I was sleepless for several months and there was a time I missed meaning of life...  
319 we need supports."

320 This study has strength and limitations. The study includes both quantitative and qualitative data, so the weakness of one type of data is  
321 optimized by triangulation of the other type of data. Despite this strength, since the main source of data for this study is secondary data  
322 from health facilities report and HIMS whose data are at times not good before validation exercise and the limited number of grouping  
323 variables. Such accumulated data are known to have high levels of inconsistency, missing values, and invalid records and this may be  
324 worse during the COVID-19 pandemic and in low-resource settings like Benishangul Gumuz. Secondly, the analysis cannot fully  
325 attribute the changes to intervention because of lack of control or counterfactual data. The

326 intervention affected the whole country and thus there were no areas that could work as control; thus, stronger analytical techniques like  
327 controlled interrupted time series (CITS) analysis cannot be applied. These limitations were overcome through taking only completed  
328 data and through data triangulation.

329 Discussions

330 The study showed that there was a significant decrease in ANC visits, family planning new acceptors, family planning repeated  
331 acceptors, skilled delivery, and in postnatal care within 7 days of delivery, and a significant reduction in the vaccination coverage and  
332 decline in total number of vaccines administered during the COVID-19 pandemic compared to the pre-pandemic period respectively.  
333 There was an increase in the number of home delivery notices, teenage pregnancies, and stillbirths. There was also a significant decrease  
334 in the number of children treated for diarrhea, people screened for HIV, new HIV positive people and the new HIV positive individuals  
335 put on ART, people screened for STI by syndromic diagnosis, STI cases treated and the STI cases partners traced and treated during the  
336 pandemic compared to pre-pandemic period. Many health facilities also reported experiencing financial instability because of increased  
337 expenses associated with responding to the pandemic and lower revenues from decreased use of other health facilities services.

338 The study showed that there was a significant decrease in ANC visits, family planning new acceptors, family planning repeated  
339 acceptors, skilled deliveries, and postnatal care within 7 days of delivery during the COVID-19 pandemic compared to the pre-pandemic  
340 period respectively. This is similar to a study in Ethiopia (14) and it is higher than 10% reduction predicated for low-income countries  
341 (15).

342 This is might be due to a strained health care system, disruption in care, and redistribution of resources and fear of service seekers to  
343 visit health facilities (7). As it is stated below, this leads to high home delivery rate, high in still birth rate and teenage and unwanted

344 and unplanned pregnancy. For example, a woman at ANC center come for ANC service said that “*I have six children and I planned to*  
345 *be more pregnant and I was using injectable form of contraceptive, but I have missed my appointment day during the pandemic. Because*  
346 *of it I become pregnant (unwanted and unplanned) ...”*

347 No significant differences were observed in neonatal deaths within 7 days of delivery (institutional), neonatal deaths reported  
348 (community-based), and neonates treated for sepsis during the pre-pandemic and post-pandemic period. This is likely due to the fact  
349 that the community has not reported all cases, and as noted above, the number of institutional deliveries has decreased significantly  
350 during the pandemic.

351 There was a significant decrease in almost all vaccine doses given. This finding supports the United Nations report of COVID-19  
352 negative effect on vaccination (16). A reduction in the vaccination coverage and decline in total number of vaccines administered, led  
353 to children missing out on their vaccine doses is also reported by a systematic review study (17). This may put the region at risk of  
354 vaccine preventable diseases outbreaks, extremely contagious diseases like measles (18)

355 There was a significant decrease in number of children treated for diarrhea during the COVID-19 pandemic compared to the pre-  
356 pandemic period. A clinician at under 5 OPD in one health facility said that “*...the number of children presented with complaint of*  
357 *diarrhea was highly reduced during the pandemic, but later after the pandemic peak the diarrhea cases are increasing...*” No similar

358 research works were identified during literature search. This low diarrheal disease incidence rate may be due to adherence to the COVID-  
359 19 preventive measures and protocols could be protective and reduce the incidence diarrheal disease (19).

360 The study found that there were no significant excess overall still births and community based neonatal death notification in the post-  
361 pandemic compared to the pre-pandemic period, although the number of causes was higher than the level of pre-pandemic period. Higher  
362 number of still birth and community based neonatal death is what is expected because of significantly reduced ANC follow-up and post-  
363 natal care follow-up, both causing home delivery (15). The non-significant increment cases may be due to non-reporting all cases due  
364 to restriction of movements, fear of the pandemic and/or the parents not need to report the cases and the health professional not tracing  
365 the cases. A pregnant mother coming for ANC at one health facility said that “*the time was stressful; it was not easy to visit health*  
366 *facilities due to fear of the pandemic and the health professional were also in stress during the time... many interrupt their ANC follow*  
367 *up and home delivery was also common...*”

368 The study also found that there was no significant decrease in the number of under 5 children screened for malnutrition and diagnosed  
369 as malnourished during the post-pandemic period. This is due to decrement in number of children visiting the health facilities during  
370 the pandemic. However, the prevalence of malnourished individual among children was higher post-pandemic compared with pre-  
371 pandemic period. Health professional at under 5 OPD in one health facility said that “*generally the number of malnourished children is*  
372 *increasing, post-pandemic the number of children coming to our facility is decreased, but the number of malnourished children is*  
373 *increasing...*” This finding is agreed with a study report by a Standing Together for Nutrition consortium (ST4N) (20). This may be due

374 to steep declines in household incomes, changes in the availability and affordability of nutritious foods, and interruptions to health,  
375 nutrition, and social protection services, especially among poor households leading in difficulty in accessing food (21,22, 23)

376 The COVID-19 pandemic has imposed a great economic and psychosocial impact on people living with the virus. A woman on ART  
377 treatments coming for collecting her ART medication at one health facility said that “*the media, the community, and even the health*  
378 *professionals are saying that we are the high-risk group and this makes us hopeless and highly stressed. We are stigmatized, we lost*  
379 *our freedom and it was also difficult to collect our medicines. Personally, I have missed many pills, but later the health professionals*  
380 *had extended our medication collection time to 6 months which reduced our suffering.*”

381 Social isolation and Loneliness were also another challenge for PLHIV. A woman at ART clinic said that “*I was separated from my*  
382 *families and may friends and this condition worsen my stress. There is a time that I dived to hung myself...anyways it is passed thanks*  
383 *to GOOD. However, we are still in economic crisis ...*” This is a similar finding with study reported by similar study elsewhere (24).

384 Morbidity and mortality among PLHIV were high and the number of HIV testing service seekers have been highly reduced during the  
385 pandemic. For example, a health professional working in ART clinic at one health facility said “*the period was stressful especially to*  
386 *PLHIV and health professionals working in ART clinic... most patients have missed their appointment and their pills. Most of PLHIV*  
387 *were the most affected and most are mentally disordered during the pandemic. HIV test and prevention measures were highly affected*



388 *during the pandemic, because the numbers of service seekers were highly reduced due to fair of COVID-19; health professionals fair of*  
389 *the pandemic; shortage of test kit and personal protection equipment and materials.*

390 Adherence to ART is greatly reduced, and ART drop rate are high. During the pandemic, the incidence of HIV has been greatly reduced.  
391 For example, a health official said that *“the effect of the pandemic on adherences and ART follows up, Viral load test and other follow-*  
392 *ups and health services was high. For example, about 170 PLHIV was lost from follow-up during the pandemic, who were later traced*  
393 *and about 80% of them returned to the regular follow-up. ...the number of new HIV cases has dropped significantly during the pandemic*  
394 *as very few people are tested for HIV.”*

395 The interruption of HIV/AIDS health care services during the pandemic is also reported by similar studies indifferent parties of the  
396 world (22,23). World health organization African region indicated that reduced quality clinical care owing to health facilities becoming  
397 overstretched, and a suspension of viral load testing, reduced adherence counseling and drug regimen switches (25). This disruption in  
398 treatment and prevention measures may results in increased morbidity, mortality, HIV transmission and drug resistance, which highly  
399 affects the prevention and control efforts of HIV/AIDS.

400 There was a significant decrease in the number of people screened for STI by syndromic diagnosis, STI cases treated and STI cases  
401 partners traced and treated during the pandemic compared to the pre- pandemic period respectively. This redaction in STI case reporting  
402 was also reported in a similar study elsewhere (26). This fact can be explained with significant underdiagnosis and underreporting of

403 cases during the pandemic because of reduced screening or it also may reflect a true decline in STI transmission due to social distancing  
404 measures during the pandemic (27). This disruption in treatment and prevention measures of STIs may results in increased morbidity,  
405 STI transmission, HIV transmission and drug resistance, which highly affects the prevention and control efforts of STIs and HIV/AIDS  
406 (27).

407 There was no statistically significant increase in the number of people screened for TB, but there was a statistically significant decrease  
408 in the number of new TB cases during the pandemic compared to pre-pandemic period. These findings are similar to a study in Japan  
409 and India that reported a significant decrease in new-causes TB after the COVID-19 pandemic (9). This is may be due to reduction in  
410 the prevalence of other infectious diseases due to greater using of Personal Protective Equipment (PPE), social distancing and other  
411 sanitizing practices during the pandemic (19,28).

412 However, COVID-19 pandemic has imposed a great economic and psychosocial impact on old tuberculosis cases. A man on anti-TB  
413 medication at one health facility said that “*the media, the community, and every one talking that TB patients are risky group for COVID-*  
414 *19 infection and this makes us stressed. We are stigmatized and we lost our freedom. Personally, I missed many pills, but later the time*  
415 *duration of medication collection was extended to 4/6 months, which reduced our suffering.*” A health professional working in a TB  
416 clinic at one health facility said “*the period was stressful especially to TB patients and health professionals working in TB clinic... most*  
417 *patients have missed their appointment and their pills. Latter after the peak pandemic time was passed, we tried our best to trace the*

418 *missed patients and make their refilling time longer and also have provided personal protections and psychosocial supports. The number*  
419 *of new cases is reduced...”*

420 However, the new TB cases reduced due to COVID-19 protection protocols, the disruption in treatment and treatment drop rate may  
421 results in increased morbidity, mortality, TB transmission and drug resistance in M. TB, which highly affects the TB prevention and  
422 control efforts.

423 The number of people visited health facilities for malaria investigation and people treated for malaria was significantly reduced. This  
424 finding is similar with studies from malaria endemic countries that reported the reduction of people screened for malaria and malaria  
425 cases treated in the health facilities (29). This reduction is likely due to reductions in malaria screening and treatment in health facilities  
426 due to the fear of contact with COVID-19 cases and the lack of transportation access due to community quarantine. The reduction in  
427 malaria screening, treatment and other prevention measures might have increased morbidity, mortality and malaria transmission that  
428 have great negative impact on malaria prevention, control and elimination efforts of the region as well as national (30).

429 There was no statistically significant increase in the number of people screened for DM, but there was a statistically significant increase  
430 in the number of people with elevated blood sugar during the pandemic compared to the pre-pandemic period. Bill published a similar  
431 report explaining the possible cause of elevated blood sugar levels (DM) during the COVID-19 pandemic (31). Nonetheless, this requires

432 further investigation, but in this study, individuals at higher risk for DM were screened, possibly due to fear of higher risk for COVID-  
433 19.

434 The number of people visited health facilities for HTN screening and the number of individuals with raised blood pressure was  
435 significantly increased. In this study, the increment is due to individuals at higher risk for HTN were screened, possibly due to fear of  
436 higher risk for COVID-19. It may also be due to increased blood pressure due to COVID-19 panic among people at risk for of high  
437 blood pressure (32).

438 The impact of COVID-19 on the follow-up and care of chronic diseases like diabetes and hypertension is similarly reported in a narrative  
439 review describing as “the lockdown of different services decreased referral, access and hospitalization resulting in inadequate ongoing  
440 care for chronic conditions among needy patients” (33).

441 This due to the reallocation of resources from different sources from chronic disease prevention, diagnosis, management, and  
442 rehabilitation during the outbreak. The lockdown of different services has also reduced referrals, access and hospitalizations, leading to  
443 inadequate ongoing care for chronic conditions for patients in need (34).

444 Many health facilities have reported financial instability due to increased costs associated with responding to the pandemic as well as  
445 reduced revenue due to reduced use of other health facilities services. Unlike urban health facilities reporting patients fear to come to  
446 health facilities and supply shortage as the main reason, rural health facilities reported supply shortage as the main reasons.

## 447 Conclusions and Recommendations

448 The study shows that the COVID-19 pandemic and its responses, such as lockdown and community quarantines, have had a significant  
449 negative effect on essential health services, most notably in Benishangul Gumuz Region in the Assosa district of western Ethiopia.  
450 Groups of individuals to be at higher risk of morbidity and mortality are the most significantly affected. Some sort of strategy for the  
451 indirect effects of the COVID-19 pandemic, as health officials explained in interviews, has improved the district highly affected health  
452 care delivery.

453 The researcher recommends an urgent and comprehensive action to mitigate the future (long term) impacts of Covid-19 on health of the  
454 community such as: treatment adherences and drug resistance, worsening of chronic conditions, disease outbreaks, maternal and child  
455 mortality, chronic undernutrition, and the possibility of an increment in infection and mortality from HIV/AIDS/STI. This raises the  
456 need for global collaboration in national planning, health system strengthens, community-based measures, and donor investments to  
457 prevent the reintroduction and re-establishment of existing endemics to avoid increased morbidity and mortality. Protecting the long-  
458 term health outcomes and improving the financial security of groups of people living in deprivation is also strongly recommended for  
459 local and national concerned government bodies and non-governmental organizations working in the area.

460 *Declarations*

461 *Abbreviations*

462 ***AIDS:** Acquired immune deficiency syndrome; **ANC:** Antenatal Care; **ART:** Antiretroviral therapy; **BGR:** Benishangul Gumuz Region; **CDC:** Communicable*  
463 *diseases control; **COVID-19:** Coronavirus disease 2019; **DM:** Diabetes Mellitus; **EIDs:** Emerging infectious diseases; **EVD:** Ebola virus disease; **FP:** Family*  
464 *Planning; **HCPs:** Health care providers; **HCWs:** Health care workers; **HF:** Health Facilities; **HIV:** Human immunodeficiency virus; **HTN:** Hypertension; **KI:***  
465 *key informant; **NCD:** Non-communicable Disease ; **OPD:** Outpatient Diagnosis; **PLHIV:** People living with human immune deficiency virus; **RHB:** Regional*  
466 *health Bauru; **STIs:** Sexual Transmitted Infections; **UNAIDS:** United Nations AIDS found ; **WHO:** World Health Organization*

#### 467 **Funding**

468 *This study was not funded by an organization*

#### 469 **Acknowledgments**

470 *I would like to thank the study participants for voluntarily taking part in the study for their participation and local health officials and community leaders for their*  
471 *cooperation. I also thank data collectors for their commitment and collecting quality data.*

#### 472 **Author contributions**

473 *All core activities: conceptualization, field work and data collection, formal analysis and investigation, and result writing and manuscript preparation were done*  
474 *by the author [Alemayehu Assefa].*

#### 475 **Availability of data and materials**

476 *All data that support the findings of this study are available from the author upon request*

#### 477 **Ethics approval and consent to participate**

478 *The planning, the conduct, and reporting of the research are in accordance with the Helsinki Declaration. The study was approved by the Institutional Review*  
479 *Board of Assosa University (Ref No: ASU/IRB/003/2017/22). Prior to conducting of the study, a letter of support was obtained from the district health offices and*  
480 *meetings were held with community leaders and community members to explain the aims of the study. The aim of the study was explained to the study participants,*

481 *and an informed written and verbal consent have been obtained from each participant Ethical approval and informed consent forms and paper copies of signed*  
482 *consents have been kept in a confidential place.*

483 ***Consent for publication***

484 *Not applicable*

485 ***Conflict of interests***

486 *The author declare that he has no competing of interest to disclose that are relevant to this article.*

487 ***Supporting information files***

488 S1 Fig: Map of the study area. Source: BGR,2020

489 S1 Table: Effects of COVID-19 pandemic on maternal, neonatal and child health care services in BG, west Ethiopia

490 S2 Table: Effects of COVID-19 pandemic on HIV and STI care services in BGR, Assosa Zone, west Ethiopia

491 S3 Table: Effects of COVID-19 pandemic on TB and malaria care services in BGR Assosa zone, west Ethiopia

492 S4 Table: Effects of COVID-19 pandemic on non-communicable diseases care services in BGR Assosa zone, west Ethiopia

493 **References**

- 494 1. Yang H, Ma J. How an Epidemic Outbreak Impacts Happiness: Factors that Worsen (vs. Protect) Emotional Well-being during the  
495 Coronavirus Pandemic. *Psychiatry Res.* 2020 Jul;289:113045. doi: 10.1016/j.psychres.2020.113045. Epub 2020 Apr 30. PMID:  
496 32388418; PMCID: PMC7190485.

- 497 2. González-Sanguino C, Ausín B, Castellanos MÁ, Saiz J, López-Gómez A, Ugidos C, Muñoz M. Mental health consequences during  
498 the initial stage of the 2020 Coronavirus pandemic (COVID-19) in Spain. *Brain Behav Immun*. 2020 Jul;87:172-176. doi:  
499 10.1016/j.bbi.2020.05.040. Epub 2020 May 13. PMID: 32405150; PMCID: PMC7219372.
- 500 3. Kawohl W, Nordt C. COVID-19, unemployment, and suicide. *Lancet Psychiatry*. 2020 May;7(5):389-390. doi: 10.1016/S2215-  
501 0366(20)30141-3. PMID: 32353269; PMCID: PMC7185950.
- 502 4. COVID-19 National Preparedness Collaborators. Pandemic preparedness and COVID-19: an exploratory analysis of infection and  
503 fatality rates, and contextual factors associated with preparedness in 177 countries, from Jan 1, 2020, to Sept 30, 2021. *Lancet*. 2022  
504 Apr 16;399(10334):1489-1512. doi: 10.1016/S0140-6736(22)00172-6. Epub 2022 Feb 1. PMID: 35120592; PMCID: PMC8806194.
- 505 5. Hamid, Husnain, Zubia Abid, Attiya Amir, Touseef Ur Rehman, Waqas Akram, and Tooba Mehboob. “Current Burden on  
506 Healthcare Systems in Low- and Middle-Income Countries: Recommendations for Emergency Care of COVID-19.” *Drugs &*  
507 *Therapy Perspectives : For Rational Drug Selection and Use* 36, no. 10 (2020): 466–68. doi:10.1007/s40267-020-00766-2.
- 508 6. Baral P. Health Systems and Services During COVID-19: Lessons and Evidence From Previous Crises: A Rapid Scoping Review  
509 to Inform the United Nations Research Roadmap for the COVID-19 Recovery. *International Journal of Health Services*.  
510 2021;51(4):474-493. doi:10.1177/0020731421997088
- 511 7. Sochas L, Channon AA, Nam S. Counting indirect crisis-related deaths in the context of a low-resilience health system: the case of  
512 maternal and neonatal health during the Ebola epidemic in Sierra Leone. *Health Policy Plan*. 2017 Nov 1;32(suppl\_3):iii32-iii39.  
513 doi: 10.1093/heapol/czx108. PMID: 29149310.



- 514 8. Camara, B. S., Delamou, A., Diro, E., Béavogui, A. H., El Ayadi, A. M., Sidibé, S., et al. Effect of the 2014/2015 Ebola outbreak  
515 on reproductive health services in a rural district of Guinea: an ecological study, *Transactions of The Royal Society of Tropical*  
516 *Medicine and Hygiene*, Volume 111, Issue 1, January 2017, Pages 22–29, <https://doi.org/10.1093/trstmh/trx009>
- 517 9. Khetrapal S, Bhatia R. Impact of COVID-19 pandemic on health system & Sustainable Development Goal 3. *Indian J Med Res.*  
518 2020 May;151(5):395-399. doi: 10.4103/ijmr.IJMR\_1920\_20. PMID: 32611910; PMCID: PMC7530436.
- 519 10. Haileamlak A. How Can Ethiopia Mitigate the Health Workforce Gap to Meet Universal Health Coverage? *Ethiop J Health Sci.*  
520 2018 May;28(3):249-250. doi: 10.4314/ejhs.v28i3.1. PMID: 29983523; PMCID: PMC6016355.
- 521 11. World Health Organization. Health workforce requirements for universal health coverage and the Sustainable Development Goals.  
522 (Human Resources for Health Observer,2016; 17). World Health Organization. <https://apps.who.int/iris/handle/10665/250330>
- 523 12. Assefa A, Erko B, Gundersen SG, Medhin G, Berhe N. Low awareness and common misconceptions about schistosomiasis in  
524 endemic lowland areas in Western Ethiopia: a mixed-methods study. *BMC Public Health.* 2021 Jun 4;21(1):1064. doi:  
525 10.1186/s12889-021-11106-y. PMID: 34088297; PMCID: PMC8178865.
- 526 13. Bureau of Planning and Economic Development (BOFED). Benishangul-Gumuz Regional State physical and socio-economic  
527 profile. 2017;61. <https://bgrsdrmc.gov.et/.../uploads/2021/08/BG-Regional-Profile-201>
- 528 14. Abdela, S. G., Berhanu, A. B., Ferede, L. M. & van Griensven, J. Essential healthcare services in the face of COVID-19 prevention:  
529 Experiences from a referral hospital in Ethiopia. *American Journal of Tropical Medicine and Hygiene* 103, 1198–1200 (2020)

- 530 15. Riley, T., Sully, E., Ahmed, Z., & Biddlecom, A. Estimates of the Potential Impact of the COVID-19 Pandemic on Sexual  
531 and Reproductive Health In Low- and Middle-Income Countries. *International Perspectives on Sexual and Reproductive Health*,  
532 202;46, 73–76. <https://doi.org/10.1363/46e9020>
- 533 16. United Nations Department of Economic and Social Affairs. The Sustainable Development Goals Report 2020. Geneva, Switzerland;  
534 2020. <https://unstats.un.org/sdgs/report/2020/>. The-Sustainable-Development-Goals-Report-2020 pdf.
- 535 17. Lassi, Z. S., Naseem, R., Salam, R. A., Siddiqui, F. & Das, J. K. The Impact of the COVID-19 Pandemic on Immunization  
536 Campaigns and Programs: A Systematic Review. *International journal of environmental research and public health* [Online],  
537 2021;18. Available: <http://europepmc.org/abstract/MED/33499422>.
- 538 18. Ali, I. Impact of COVID-19 on vaccination programs: adverse or positive? *Hum Vaccin Immunother*, 16, 2594-2600.
- 539 19. Mohammadsadeghi, A. 2021. Reduction in the incidence of infectious diseases during the COVID-19 pandemic: A hypothesis. *Med*  
540 *Hypotheses*, 2020;146, 110465.
- 541 20. Standing Together for Nutrition consortium. Impacts of COVID-19 on childhood malnutrition and nutrition-related mortality. *The*  
542 *Lancet*, 2020;396(10250), 519-521. [https://doi.org/10.1016/S0140-6736\(20\)31647-0](https://doi.org/10.1016/S0140-6736(20)31647-0).
- 543 21. Akseer, N., Kandru, G., Keats, E. C. & Bhutta, Z. A.. COVID-19 pandemic and mitigation strategies: implications for maternal and  
544 child health and nutrition. *The American journal of clinical nutrition*, 2020;112, 251-256.
- 545 22. Sanchez, T. H., Zlotorzynska, M., Rai, M. & Baral, S. D. Characterizing the Impact of COVID-19 on Men Who Have Sex with Men  
546 Across the United States in April, 2020. *AIDS and behavior*, 2020;24, 2024-2032.

- 547 23. Kalichman, S. C., Eaton, L. A., Berman, M., Kalichman, M. O., Katner, H., Sam, S. S., et al. Intersecting Pandemics: Impact of  
548 SARS-CoV-2 (COVID-19) Protective Behaviors on People Living With HIV, Atlanta, Georgia. *Journal of acquired immune*  
549 *deficiency syndromes* (1999), 2020;85, 66-72.
- 550 24. Rhodes, S. D., Mann-Jackson, L., Alonzo, J., Garcia, M., Tanner, A. E., Smart, B. D., et al. A Rapid Qualitative Assessment of the  
551 Impact of the COVID-19 Pandemic on a Racially/Ethnically Diverse Sample of Gay, Bisexual, and Other Men who Have Sex with  
552 Men Living with HIV in the US South. *AIDS and behavior*, 2021;25, 58-67.
- 553 25. L. Jewell, Britta; Mudimu, Edinah; Stover, John; Kelly, Sherrie L.; Phillips, Andrew: Potential effects of disruption to HIV  
554 programmes in sub-Saharan Africa caused by COVID-19: results from multiple mathematical models. figshare. Preprint.  
555 <https://doi.org/10.6084/m9.figshare.2020:12279914.v1>
- 556 26. Sentís, A., Prats-Uribe, A., López-Corbeto, E., Montoro-Fernandez, M., Nomah, D. K., De Olalla, P. G., et al. The impact of the  
557 COVID-19 pandemic on Sexually Transmitted Infections surveillance data: incidence drop or artefact? *BMC public health*, 2021;21,  
558 1637-1637.
- 559 27. Wright SS, Kreisel KM, Hitt JC, Pagaoa MA, Weinstock HS, Thorpe PG. Impact of the COVID-19 Pandemic on Centers for Disease  
560 Control and Prevention-Funded Sexually Transmitted Disease Programs. *Sex Transm Dis*. 2022 Apr 1;49(4):e61-e63. doi:  
561 10.1097/OLQ.0000000000001566. PMID: 34654769; PMCID: PMC9214625.
- 562 28. Dadras, O., Alinaghi, S. a. S., Karimi, A., Mohssenipour, M., Barzegary, A., Vahedi, F., *et al.* Effects of COVID-19 prevention  
563 procedures on other common infections: a systematic review. *European Journal of Medical Research*, 2021;26.

- 564 29. Zawawi, A., Alghanmi, M., Alsaady, I., Gattan, H., Zakai, H. & Couper, K. The impact of COVID-19 pandemic on malaria  
565 elimination. *Parasite Epidemiol Control*, 2020;11, e00187.
- 566 30. Chiodini, J. COVID-19 and the impact on malaria. *Travel Med Infect Dis*, 2020;35, 101758.
- 567 31. Bill S. Can-covid-19-lead-to-diabetes-heres-what-you-need-to-know. 2021;22:04. [https:// www. nationalgeographic.co.uk/science-](https://www.nationalgeographic.co.uk/science-and-technology/2021/06/)  
568 [and-technology/2021/06/](https://www.nationalgeographic.co.uk/science-and-technology/2021/06/).
- 569 32. Abhyankar, M., Majumder, B., Agarwal, D. K., Amarnath, K. A., Jha, M., Kumar, B. K., *et al.* An indian clinician outlook on  
570 hypertension care during Covid-19 pandemic. *European Journal of Preventive Cardiology*, 2021;28, zwab061.148.
- 571 33. Fekadu, G., Bekele, F., Tolossa, T., Fetensa, G., Turi, E., Getachew, M., *et al.* Impact of COVID-19 pandemic on chronic diseases  
572 care follow-up and current perspectives in low resource settings: a narrative review. *International journal of physiology,*  
573 *pathophysiology and pharmacology*, 2021;13, 86-93.
- 574 34. Danhieux, K., Buffel, V., Pairon, A., Benkheil, A., Remmen, R., Wouters, E., *et al.* The impact of COVID-19 on chronic care  
575 according to providers: a qualitative study among primary care practices in Belgium. *BMC Fam Pract*, 2020;21,  
576 255.<https://covid19.epi.gov.et/status-update-on-covid19-ethiopia-October-27-2021>.
